# Supplementary material
Source: PubMed Central journal article supplement (PMC2002536)
Supplement: 7400976-s1.pdf [file 7400976-s1.pdf]

Supplementary figure 1

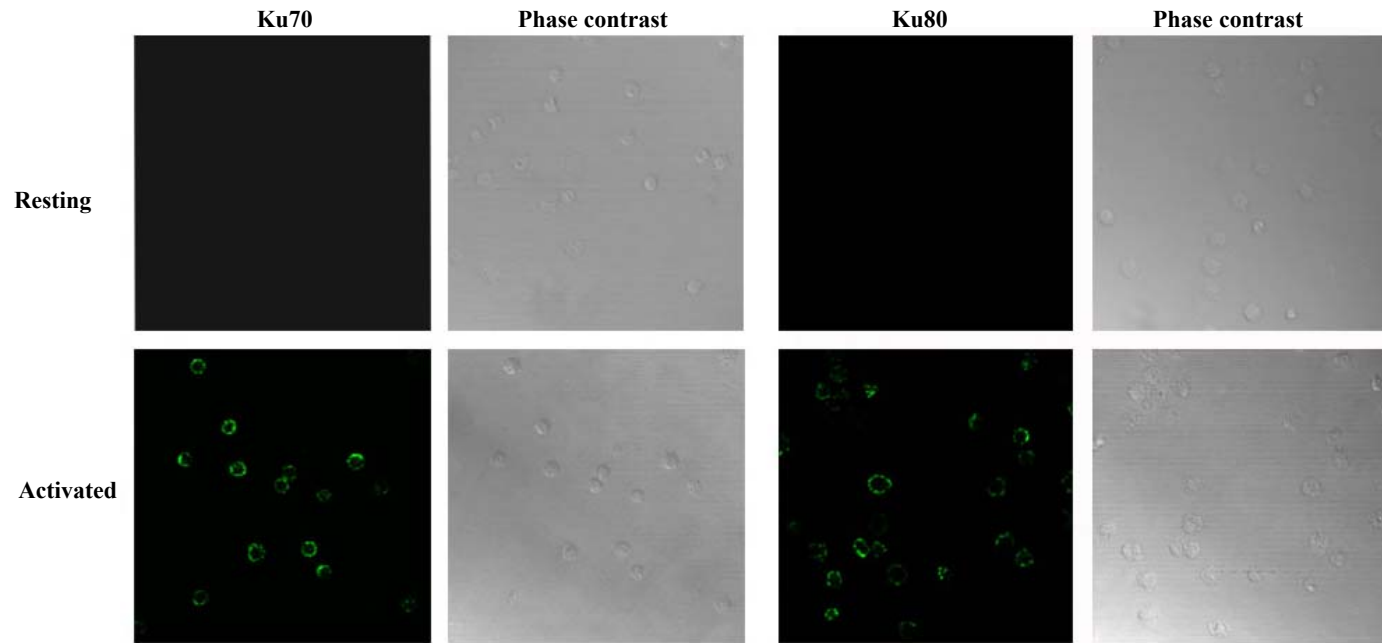

**Supplementary figure 1. Ku cell surface expression is induced during monocytes activation.** Living resting or differentiated monocytes (18 hrs in the presence of M-CSF) stained with anti-Ku70 or anti-Ku80 antibody were plated onto L-polylysine-coated coverslips and fixed. The confocal laser scanning micrographs show horizontal section of cells. Digital images were taken at x 40 magnification (zoom 3)
