# Supplementary material
Source: PubMed Central journal article supplement (PMC2002536)
Supplement: 7400976-s2.pdf [file 7400976-s2.pdf]

Supplementary figure 2

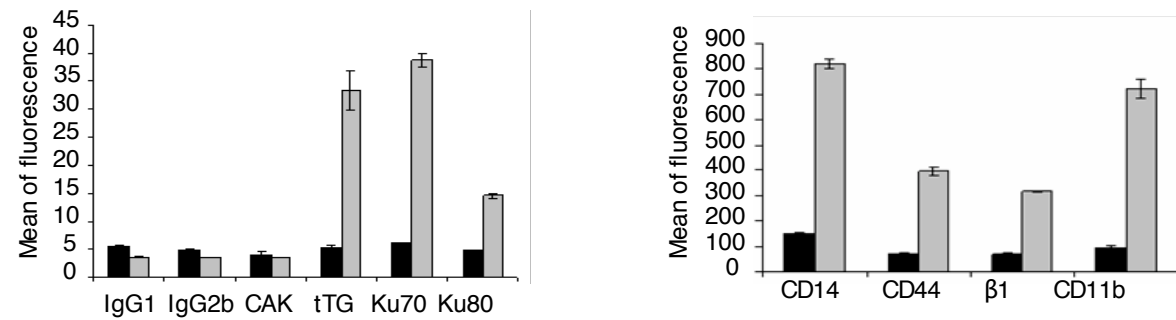

**Supplementary figure 2. Ku cell surface expression during monocytes activation show few variations among donors .** Resting (dark histograms) and differentiated (18 hrs in the presence of M-CSF, grey histograms) monocytes isolated from different donors (n=7) and on different occasions (n=12) were assayed for the cell surface expression of the indicated antigens or isotype-matched controls by flow cytometry. Values are expressed as mean fluorescence intensities.
