# Supplementary material
Source: PubMed Central journal article supplement (PMC2002536)
Supplement: 7400976-s3.pdf [file 7400976-s3.pdf]

### Supplementary Figure 3

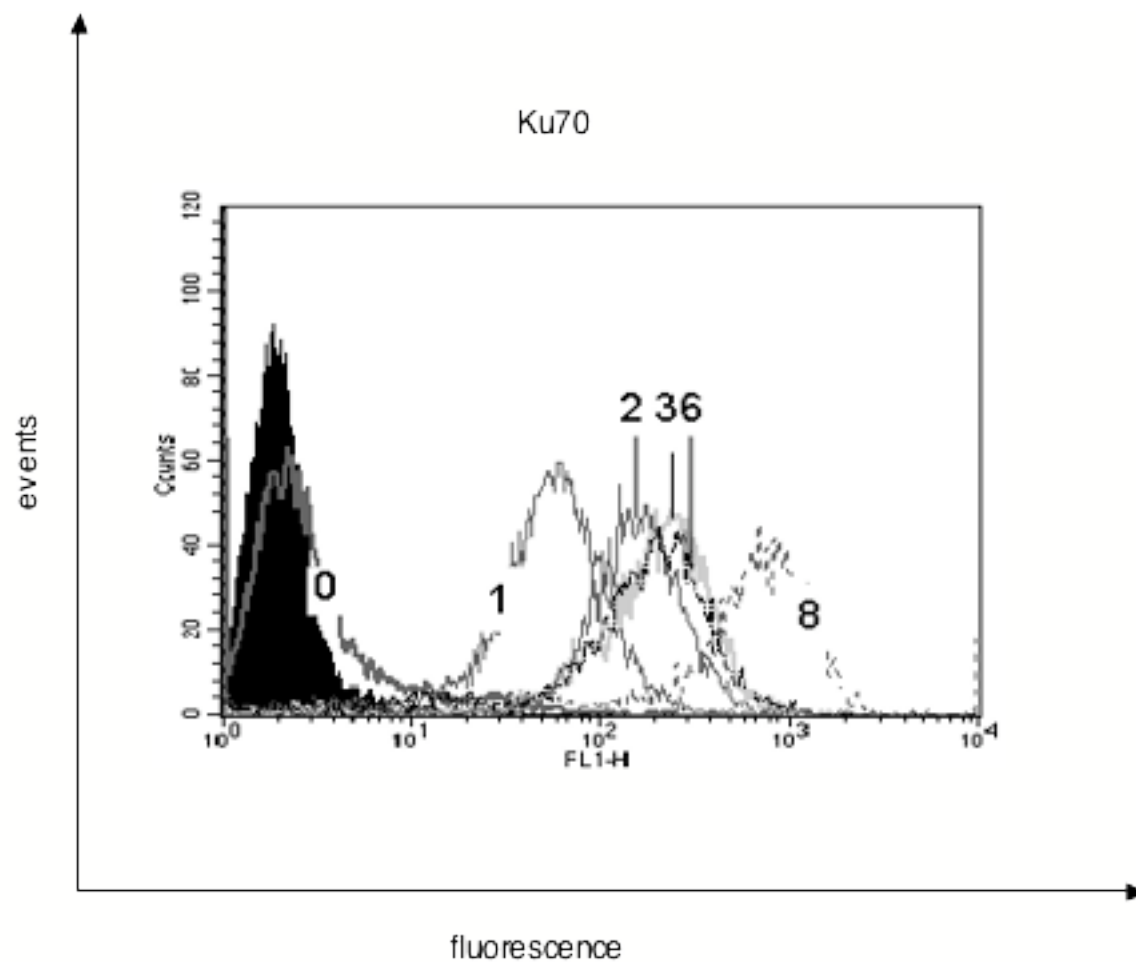

**Supplementary Figure 3. Ku70 expression on the cell surface increases during the time course of conversion of monocytes into macrophages.** Purified human monocytes were cultured or not (0) in the presence of M-CSF for the indicated time (in days) and processed for flow cytometry using anti-Ku70 antibodies, or control isotype (black histogram)
