# Supplementary material
Source: PubMed Central journal article supplement (PMC2002536)
Supplement: 7400976-s4.pdf [file 7400976-s4.pdf]

## Supplementary Figure 4

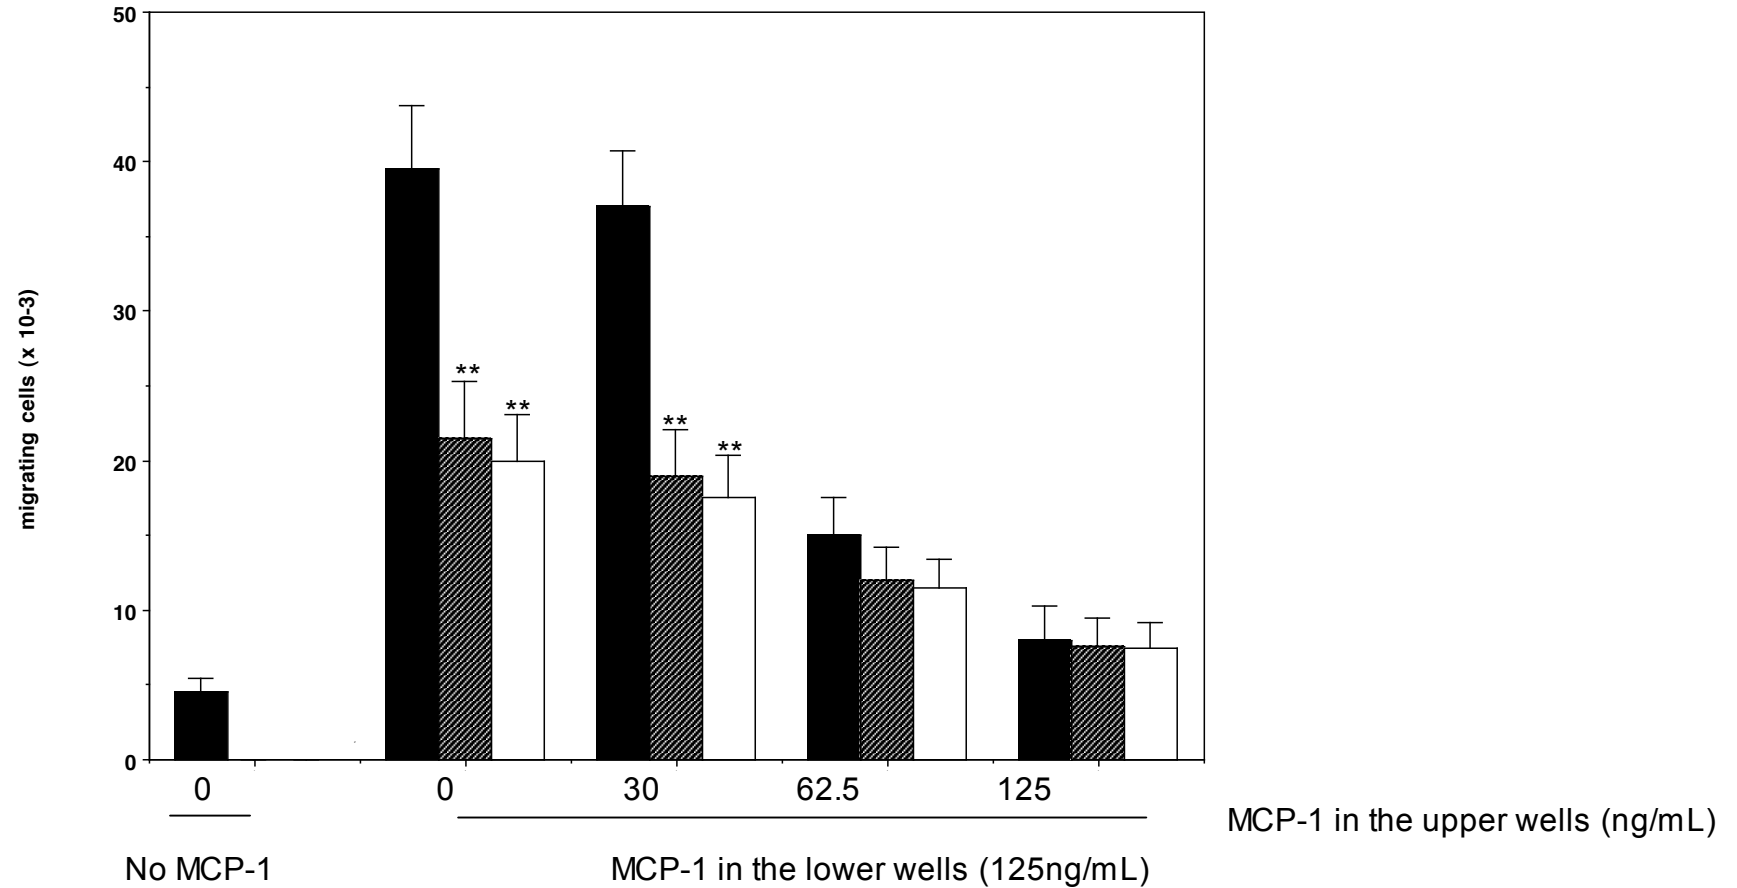

**Supplementary Figure 4. Ku is involved in chemotaxis.** Human peripheral blood monocytes were treated overnight in the presence of M-CSF and then placed into the upper chambers of Transwells where underface were coated with Fn. Before adding to Transwells, cells were incubated with IgG (black bars); anti-Ku70 (hatched bars), or anti-Ku80 (white bars) antibodies. Migration experiments were performed with various concentrations of the chemoattractant MCP-1 in the upper and the lower wells as indicated. Mean of three independent experiments (\*\* statistically significant by Student's T-test  $p < 0.01$  relative to control).
